# Supplementary material
Source: Springer Nature journal article supplement (https://www.springermedizin.de/resource/supplementary/12874_2011_673_MOESM9_ESM.pdf/9432352)

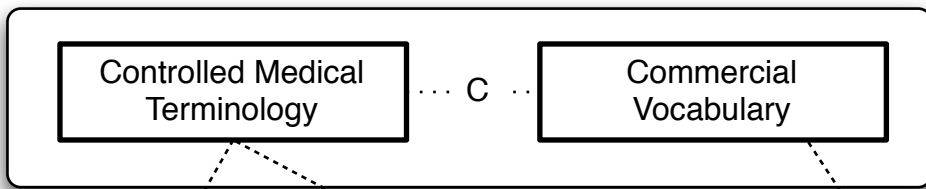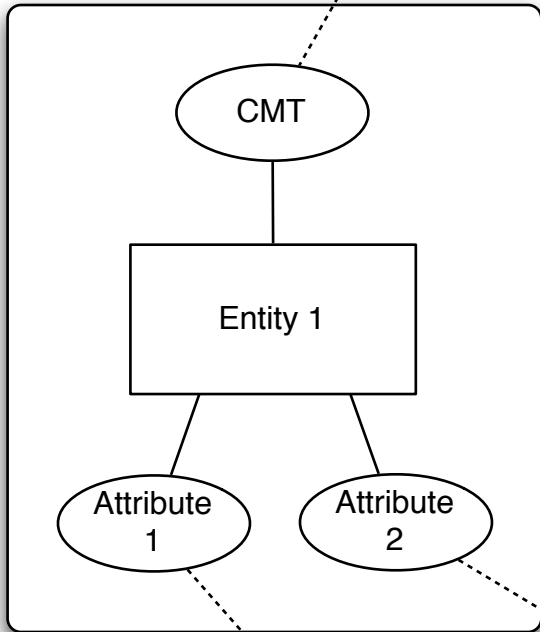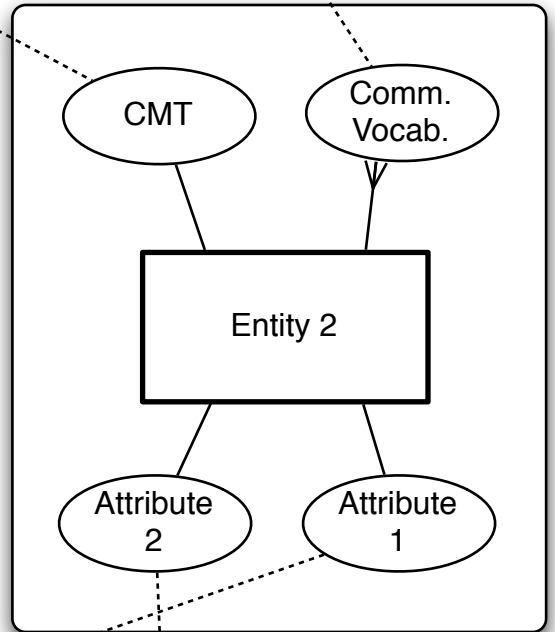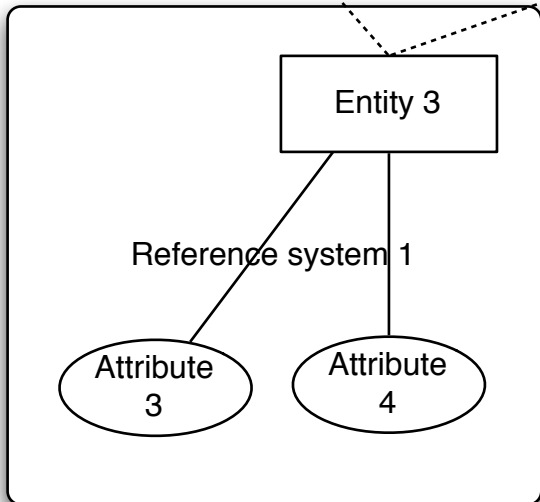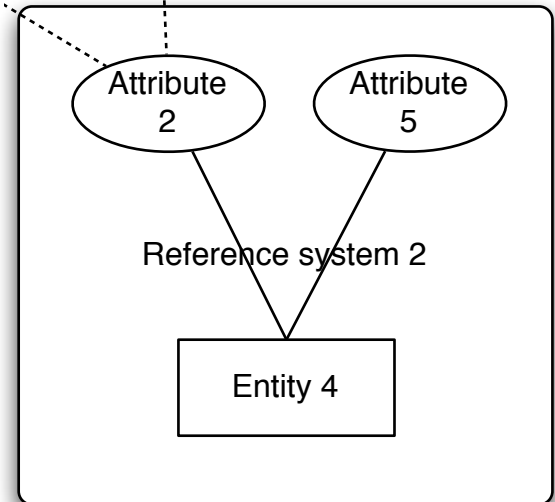

A

A

B

D

D

E

E

Supplement: MOESM9 [file 9432352]
